# Supplementary material for: Point-of-care ultrasound training for residents in anaesthesia and critical care: results of a national survey comparing residents and training program directors’ perspectives
Source: Springer Nature journal article supplement (doi:10.1186/s12909-022-03708-w), 2022-08-28
Supplement: MOESM10 [file 12909_2022_3708_MOESM10_ESM.pdf]

1. Indicate which residency school you are from (the answer will NOT be associated to the other results of the survey and will only be used to know which Schools actually filled the survey)

Only one answer is possible

- ☐ Ancona - Politecnica delle Marche
- ☐ Bari
- ☐ Bologna
- ☐ Brescia
- ☐ Cagliari
- ☐ Catania
- ☐ Catanzaro
- ☐ Chieti - Pescara
- ☐ Ferrara
- ☐ Firenze
- ☐ Foggia
- ☐ Genova
- ☐ L' Aquila
- ☐ Messina
- ☐ Milano
- ☐ Milano 'Bicocca'
- ☐ Milano San Raffaele
- ☐ Modena e Reggio Emilia
- ☐ Napoli Federico II
- ☐ Napoli II Ateneo (SUN) - vanvitelli

- ☐ Novara Piemonte Orientale
- ☐ Padova
- ☐ Palermo
- ☐ Parma
- ☐ Pavia
- ☐ Perugia
- ☐ Pisa
- ☐ Roma Campus Biomedico
- ☐ Roma Cattolica
- ☐ Roma La Sapienza
- ☐ Roma Sant'Andrea
- ☐ Roma Tor Vergata
- ☐ Sassari
- ☐ Siena
- ☐ Torino
- ☐ Trieste
- ☐ Udine
- ☐ Varese 'Insubria'
- ☐ Verona
- ☐ Humanitas

2. For each POCUS application, indicate which teaching tools are used in your residency school (more than one answer is possible):

|                                | Bedside teaching         | Online modules           | Frontal lessons          | Simulation               | Participation to research | None                     |
|--------------------------------|--------------------------|--------------------------|--------------------------|--------------------------|---------------------------|--------------------------|
| Vascular access                | <input type="checkbox"/> | <input type="checkbox"/> | <input type="checkbox"/> | <input type="checkbox"/> | <input type="checkbox"/>  | <input type="checkbox"/> |
| Lung Ultrasound                | <input type="checkbox"/> | <input type="checkbox"/> | <input type="checkbox"/> | <input type="checkbox"/> | <input type="checkbox"/>  | <input type="checkbox"/> |
| Transthoracic Echocardiography | <input type="checkbox"/> | <input type="checkbox"/> | <input type="checkbox"/> | <input type="checkbox"/> | <input type="checkbox"/>  | <input type="checkbox"/> |
| FAST                           | <input type="checkbox"/> | <input type="checkbox"/> | <input type="checkbox"/> | <input type="checkbox"/> | <input type="checkbox"/>  | <input type="checkbox"/> |
| Transcranial Doppler           | <input type="checkbox"/> | <input type="checkbox"/> | <input type="checkbox"/> | <input type="checkbox"/> | <input type="checkbox"/>  | <input type="checkbox"/> |
| Regional Anaesthesia           | <input type="checkbox"/> | <input type="checkbox"/> | <input type="checkbox"/> | <input type="checkbox"/> | <input type="checkbox"/>  | <input type="checkbox"/> |
| Diaphragm Ultrasound           | <input type="checkbox"/> | <input type="checkbox"/> | <input type="checkbox"/> | <input type="checkbox"/> | <input type="checkbox"/>  | <input type="checkbox"/> |

3. If there is an ultrasound training, who is the mentor? (more than one answer possible)

- ☐ Self-training
- ☐ A senior resident
- ☐ A consultant physician

4. Indicate the percentage of residents of your school who could attend an extra-curricular ultrasound course with financial support from the school in the last 5 years

Only one answer available

- ☐ 0%
- ☐ 25%
- ☐ 50%
- ☐ 75%
- ☐ 100%

5. How many hours of theoretical training are dedicated to each ultrasound technique in the 5-year residency school?

|                                   | 0                     | 1-2                   | 3-5                   | >5                    |
|-----------------------------------|-----------------------|-----------------------|-----------------------|-----------------------|
| Vascular access                   | <input type="radio"/> | <input type="radio"/> | <input type="radio"/> | <input type="radio"/> |
| Lung Ultrasound                   | <input type="radio"/> | <input type="radio"/> | <input type="radio"/> | <input type="radio"/> |
| Transthoracic<br>Echocardiography | <input type="radio"/> | <input type="radio"/> | <input type="radio"/> | <input type="radio"/> |
| FAST                              | <input type="radio"/> | <input type="radio"/> | <input type="radio"/> | <input type="radio"/> |
| Transcranial Doppler              | <input type="radio"/> | <input type="radio"/> | <input type="radio"/> | <input type="radio"/> |
| Regional Anaesthesia              | <input type="radio"/> | <input type="radio"/> | <input type="radio"/> | <input type="radio"/> |
| Diaphragm Ultrasound              | <input type="radio"/> | <input type="radio"/> | <input type="radio"/> | <input type="radio"/> |

6. Which is the minimum number of exams required to achieve basic competences in your opinion?

|                                   | 0                     | 1-10                  | 11-29                 | >=30                  |
|-----------------------------------|-----------------------|-----------------------|-----------------------|-----------------------|
| Vascular access                   | <input type="radio"/> | <input type="radio"/> | <input type="radio"/> | <input type="radio"/> |
| Lung Ultrasound                   | <input type="radio"/> | <input type="radio"/> | <input type="radio"/> | <input type="radio"/> |
| Transthoracic<br>Echocardiography | <input type="radio"/> | <input type="radio"/> | <input type="radio"/> | <input type="radio"/> |
| FAST                              | <input type="radio"/> | <input type="radio"/> | <input type="radio"/> | <input type="radio"/> |
| Transcranial Doppler              | <input type="radio"/> | <input type="radio"/> | <input type="radio"/> | <input type="radio"/> |
| Regional Anaesthesia              | <input type="radio"/> | <input type="radio"/> | <input type="radio"/> | <input type="radio"/> |
| Diaphragm Ultrasound              | <input type="radio"/> | <input type="radio"/> | <input type="radio"/> | <input type="radio"/> |

## 7. How important are ultrasound skills in the overall evaluation of the resident?

|                                   | 1 Not important at all | 2                     | 3                     | 4                     | 5 Very important      |
|-----------------------------------|------------------------|-----------------------|-----------------------|-----------------------|-----------------------|
| Vascular access                   | <input type="radio"/>  | <input type="radio"/> | <input type="radio"/> | <input type="radio"/> | <input type="radio"/> |
| Lung Ultrasound                   | <input type="radio"/>  | <input type="radio"/> | <input type="radio"/> | <input type="radio"/> | <input type="radio"/> |
| Transthoracic<br>Echocardiography | <input type="radio"/>  | <input type="radio"/> | <input type="radio"/> | <input type="radio"/> | <input type="radio"/> |
| FAST                              | <input type="radio"/>  | <input type="radio"/> | <input type="radio"/> | <input type="radio"/> | <input type="radio"/> |
| Transcranial Doppler              | <input type="radio"/>  | <input type="radio"/> | <input type="radio"/> | <input type="radio"/> | <input type="radio"/> |
| Regional Anaesthesia              | <input type="radio"/>  | <input type="radio"/> | <input type="radio"/> | <input type="radio"/> | <input type="radio"/> |
| Diaphragm Ultrasound              | <input type="radio"/>  | <input type="radio"/> | <input type="radio"/> | <input type="radio"/> | <input type="radio"/> |

## 8. Which are the evaluation used in your residency school? More than one answer is possibile

- ☐ None  
☐ Theoretical examination  
☐ Bedside evaluation  
☐ Formal theoretical and practical certification

9. Which other ultrasound technique should be implemented in residency school in your opinion? (open answer)

---

10. Do you think ultrasound training should be improved in your residency school?

|                                   | 1 - Absolutely disagree | 2                     | 3                     | 4                     | 5 - Absolutely agree  |
|-----------------------------------|-------------------------|-----------------------|-----------------------|-----------------------|-----------------------|
| Vascular access                   | <input type="radio"/>   | <input type="radio"/> | <input type="radio"/> | <input type="radio"/> | <input type="radio"/> |
| Lung Ultrasound                   | <input type="radio"/>   | <input type="radio"/> | <input type="radio"/> | <input type="radio"/> | <input type="radio"/> |
| Transthoracic<br>Echocardiography | <input type="radio"/>   | <input type="radio"/> | <input type="radio"/> | <input type="radio"/> | <input type="radio"/> |
| FAST                              | <input type="radio"/>   | <input type="radio"/> | <input type="radio"/> | <input type="radio"/> | <input type="radio"/> |
| Transcranial Doppler              | <input type="radio"/>   | <input type="radio"/> | <input type="radio"/> | <input type="radio"/> | <input type="radio"/> |
| Regional Anaesthesia              | <input type="radio"/>   | <input type="radio"/> | <input type="radio"/> | <input type="radio"/> | <input type="radio"/> |
| Diaphragm Ultrasound              | <input type="radio"/>   | <input type="radio"/> | <input type="radio"/> | <input type="radio"/> | <input type="radio"/> |

## 11. Which is the ultrasound machine availability?

|                                                     | No ultrasound machine | 1 shared with another Unit | 1 dedicated machine   | >1 dedicated machine  |
|-----------------------------------------------------|-----------------------|----------------------------|-----------------------|-----------------------|
| ICU                                                 | <input type="radio"/> | <input type="radio"/>      | <input type="radio"/> | <input type="radio"/> |
| Operating Room                                      | <input type="radio"/> | <input type="radio"/>      | <input type="radio"/> | <input type="radio"/> |
| Emergency Department                                | <input type="radio"/> | <input type="radio"/>      | <input type="radio"/> | <input type="radio"/> |
| Extra-hospital medicine                             | <input type="radio"/> | <input type="radio"/>      | <input type="radio"/> | <input type="radio"/> |
| Outpatient services (pain therapy, vascular access) | <input type="radio"/> | <input type="radio"/>      | <input type="radio"/> | <input type="radio"/> |

## 12. Limiting factors for ultrasound training (more than one answer is possible)

|                                   | Limited mentor's<br>time availability | Limited mentor's<br>expertise | Ultrasound<br>machines'<br>availability | Limited<br>resident's time<br>availability | Lack of a standardized<br>curriculum | None                     |
|-----------------------------------|---------------------------------------|-------------------------------|-----------------------------------------|--------------------------------------------|--------------------------------------|--------------------------|
| Vascular access                   | <input type="checkbox"/>              | <input type="checkbox"/>      | <input type="checkbox"/>                | <input type="checkbox"/>                   | <input type="checkbox"/>             | <input type="checkbox"/> |
| Lung Ultrasound                   | <input type="checkbox"/>              | <input type="checkbox"/>      | <input type="checkbox"/>                | <input type="checkbox"/>                   | <input type="checkbox"/>             | <input type="checkbox"/> |
| Transthoracic<br>Echocardiography | <input type="checkbox"/>              | <input type="checkbox"/>      | <input type="checkbox"/>                | <input type="checkbox"/>                   | <input type="checkbox"/>             | <input type="checkbox"/> |
| FAST                              | <input type="checkbox"/>              | <input type="checkbox"/>      | <input type="checkbox"/>                | <input type="checkbox"/>                   | <input type="checkbox"/>             | <input type="checkbox"/> |
| Transcranial Doppler              | <input type="checkbox"/>              | <input type="checkbox"/>      | <input type="checkbox"/>                | <input type="checkbox"/>                   | <input type="checkbox"/>             | <input type="checkbox"/> |
| Regional Anaesthesia              | <input type="checkbox"/>              | <input type="checkbox"/>      | <input type="checkbox"/>                | <input type="checkbox"/>                   | <input type="checkbox"/>             | <input type="checkbox"/> |
| Diaphragm Ultrasound              | <input type="checkbox"/>              | <input type="checkbox"/>      | <input type="checkbox"/>                | <input type="checkbox"/>                   | <input type="checkbox"/>             | <input type="checkbox"/> |
